# Supplementary material for: Dual use of a chemical auxiliary: molecularly imprinted polymers for the selective recovery of products from biocatalytic reaction mixtures
Source: Royal Society of Chemistry journal article supplement (doi:10.1039/c2gc35604j), 2012-01-01
Supplement: c2gc35604j_2.pdf [file c2gc35604j_2.pdf]

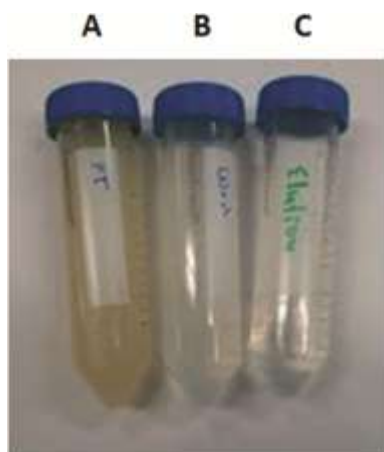

Supplementary Figure: Fractions from the MIP purification of the CYP3A4-containing membrane-catalyzed oxidation of **4**. The oxidation was performed at 37 °C with 2.6 mmol **4**, 15  $\mu$ M of CYP3A4-containing membranes, and 2.6 mmol CHP. The resulting reaction mixture was loaded onto a clean MIP, washed with 2 column volumes water and eluted with 2 column volumes methanol–acetic acid (9:1). See ESI for more detailed conditions. (A) The flow-through fraction containing most of the material other than the starting material **4** or product (**5**); (B) The wash fraction is significantly less turbid than the flow-through; (C) The elution fraction is clear.
